# Supplementary material for: Functional films from unsaturated poly(macrolactones) by thiol–ene cross-linking and functionalisation
Source: Royal Society of Chemistry journal article supplement (doi:10.1039/c3py01679j), 2014-01-01
Supplement: c3py01679j.pdf [file c3py01679j.pdf]

### Supplementary Information

## Functional films from unsaturated poly(macrolactones) by thiol-ene cross-linking and functionalisation

Zeliha Ates, Andreas Heise\*

School of Chemical Sciences, Dublin City University, Dublin 9, Ireland. Fax: 00353 (0)1 700 5503; Tel: 00353 (0)1 7006709; E-mail: andreas.heise@dcu.ie

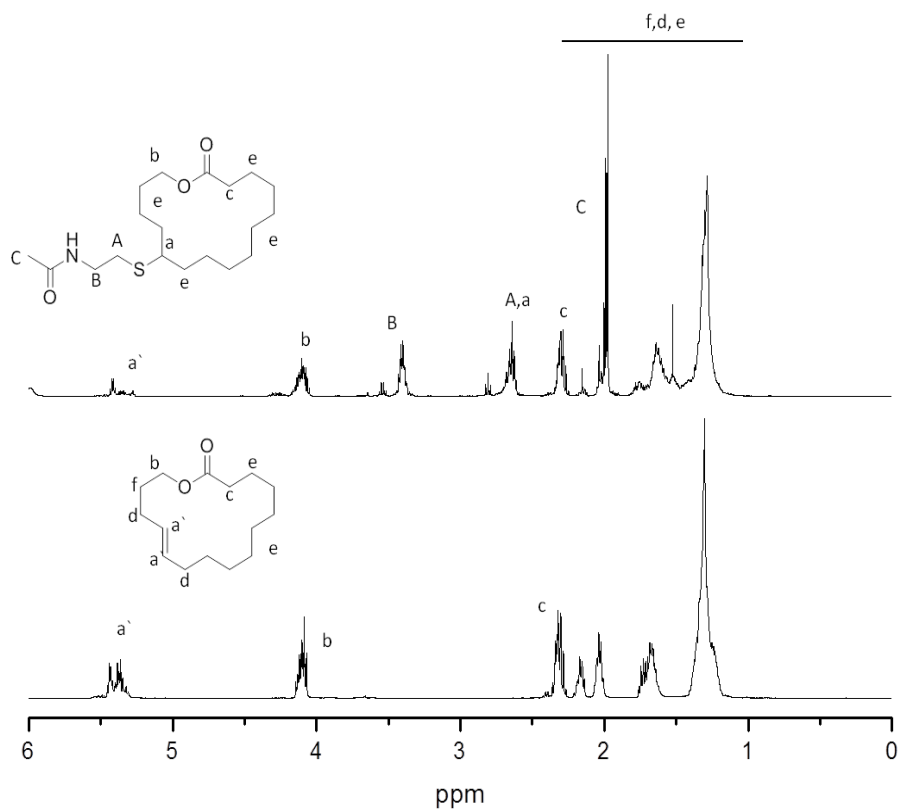

**Figure S1:** <sup>1</sup>H NMR spectra of Globalide (GI) and the thiol-ene coupling product from nACA and GI (unpurified product). Spectra recorded in CDCl<sub>3</sub> using a 400 MHz spectrometer. Thiol-ene coupling yield calculated as 55%.

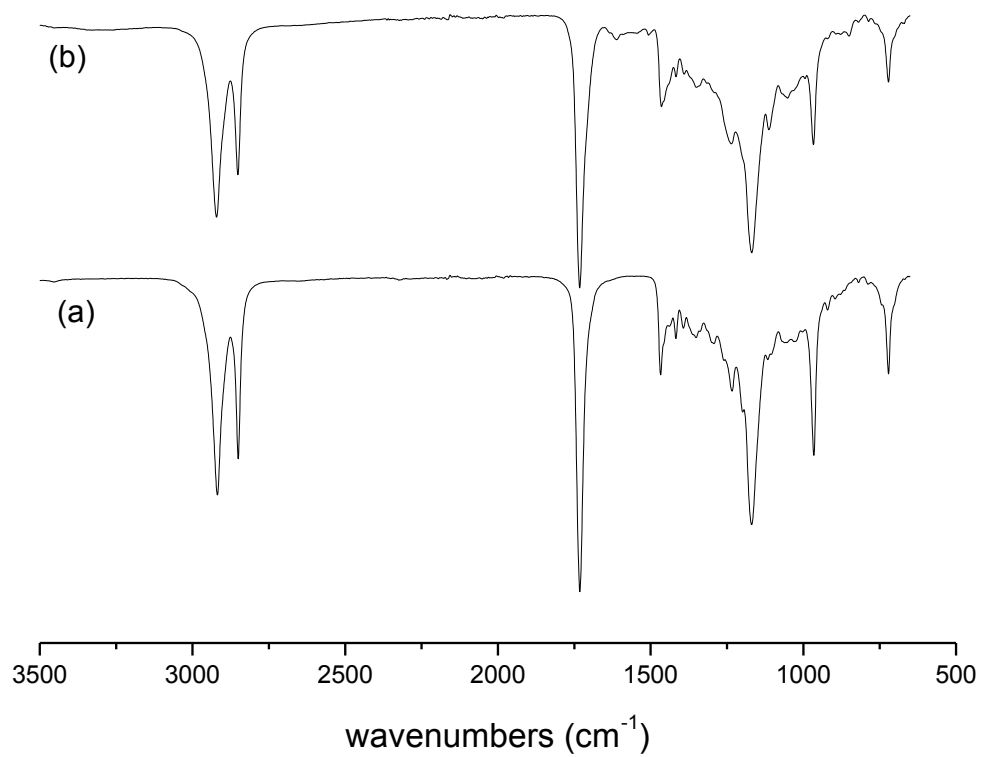

**Figure S2:** ATR-IR spectra of (a) Cross-linked PGI and (b) FITC coupled to amine functional cross-linked PGI showing no unbound FITC peak around 2100 cm<sup>-1</sup> after washing).
